# Supplementary material
Source: Springer Nature journal article supplement (https://www.springermedizin.de/resource/supplementary/12985_2011_1751_MOESM3_ESM.pdf/9611038)

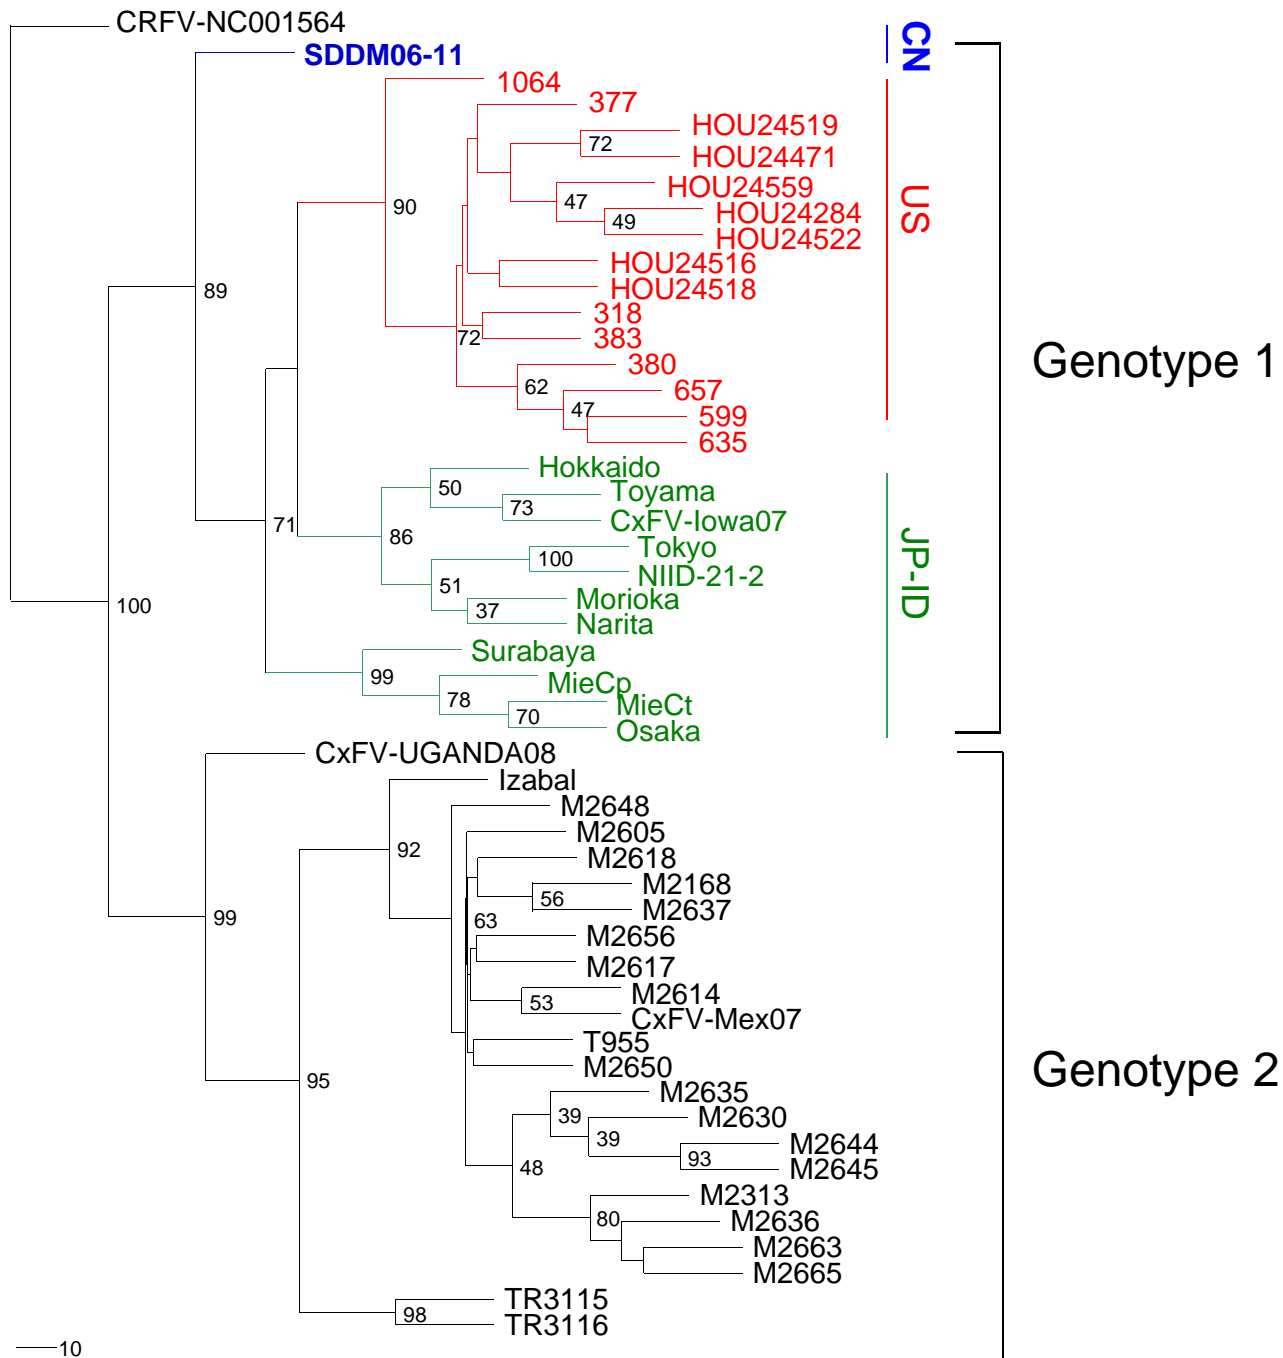

Supplement: MOESM3 [file 9611038]
